# Supplementary material for: Modulation of Cytoskeleton, Protein Trafficking, and Signaling Pathways by Metabolites from Cucurbitaceae, Ericaceae, and Rosaceae Plant Families
Source: Pharmaceuticals (Basel). 2022 Nov 10;15(11):1380. doi: 10.3390/ph15111380 (PMC9698530; doi:10.3390/ph15111380)
Supplement: Supplementary file 1 [file pharmaceuticals-15-01380-s001.zip]

Archive with 7 entries (7 files):
- Supplementary_File_S1.xlsx
- Supplementary_File_S2.xlsx
- Supplementary_File_S3.xlsx
- Supplementary_File_S4.xlsx
- Supplementary_Table_S1.pdf
- Supplementary_Table_S2.pdf
- Supplementary_Table_S3.pdf
