# Supplementary material for: Modulation of Cytoskeleton, Protein Trafficking, and Signaling Pathways by Metabolites from Cucurbitaceae, Ericaceae, and Rosaceae Plant Families
Source: Pharmaceuticals (Basel). 2022 Nov 10;15(11):1380. doi: 10.3390/ph15111380 (PMC9698530; doi:10.3390/ph15111380)
Supplement: Supplementary file 1 [file pharmaceuticals-15-01380-s001.zip › Supplementary_File_S1.xlsx]

## Sheet: Sheet1
Plant Family	PMID: Reference	Purified Agent	Extract	Location Obtained/Plant details if provided
Cucurbitaceae	28573224	CuA		Sigma-Aldrich
	29552771	CuA		Sigma-Aldrich
	18405967	CuB		CK Life Sciences International Inc., Hong Kong
	18561312	CuB		CK Life Sciences International Inc., Hong Kong
	18627377	CuB		CK Life Sciences International Inc., Hong Kong
	19605406	CuB		CK Life Sciences International Inc., Hong Kong
	20182390	CuB		Shenyang Pharmaceutical University
	20590594	CuB		CK Life Sciences International Inc., Hong Kong
	22151918	CuB		Shenyang Pharmaceutical University
	22699368	CuB		Zhongxin Innova Laboratories, Tanjin, China
	23062075	CuB		Trichosanthes cucumerina L - collected ripe fruits and air-dried naturally from Thailand (Nakhon Sawa Province) /extracted and purified
	23340170	CuB		Phytomyco Research
	24691407	CuB		Zhongxin Innova Laboratories, Tanjin, China
	24729020	CuB		Sigma-Aldrich
	25487942	CuB		Sigma
	26183715	CuB		Sigma-Aldrich
	27350399	CuB		Shanghai Yuanye Bio-technology Co., Ltd, Shanghai, China
	28042385	CuB		Chengdu Herbpurify Co., Ltd, Chengdu, China
	28673003	CuB		Sigma
	29393542	CuB		Shanghai Yuanye Bio-technology Co., Ltd, Shanghai, China
	30470919	CuB		Sigma Chemical
	30548720	CuB		Shanghai Yuanye Bio-technology Co., Ltd, Shanghai, China
	30759826	CuB		Shanghai Yuanye Bio-technology Co., Ltd, Shanghai, China
	31801971	CuB		Pufei De Biotech Co., Ltd, Chengdu, China
	33664249	CuB		J&K Scientific Ltd., Beijing, China
	33799222	CuB		Tokyo Chemical Industry Co., Ltd, Tokyo, Japan
	35756619	CuB		TCI Chemicals, India
	31780930	CuC		Isolated and purified from Cucumis sativus L. leaves and fruits
	29658590	CuD		Shanghai Winherb S&T Development Co., Ltd, Shanghai, China
	32914311	CuD		Nacalai Tesque, Kyoto, Japan
	33029168	CuD		Extrasynthese, Genay, France
	8937470	CuE		Drug Synthesis and Chemistry Branch, Developmental Therapeutics Program at NCI
	9202647	CuE		Drug Synthesis and Chemistry Branch, Developmental Therapeutics Program at NCI
	20110807	CuE		Isolated and purified from calyx of Cucumis melo L.
	20347305	CuE		Isolated and purified from roots of Bryonia cretica
	20732905	CuE		Shanghai Zhanshu Chemical Technology Co., Ltd, Shanghai, China
	22842972	CuE		Shanghai Zhanshu Chemical Technology Co., Ltd, Shanghai, China
	25072848	CuE		Isolated and purified from tubers of H delavayi var. yalungensis
	25970614	CuE		Shanghai Shunbo Chempharm Co., Shanghai, China
	27106530	CuE		Baoji Chenguang Biological Engineering Technology Co., Ltd, China
	30131725	CuE		Baoji Chenguang Biological Engineering Technology Co., Ltd, China
	32012950	CuE		Baoji Herbest BioTech Co., Ltd, Baoji, Shanxi, China
	32616188	CuE		Shanghai Yuanye Bio-technology Co., Ltd, Shanghai, China
	32982778	CuE		Baoji Chenguang Biological Engineering Technology Co., Ltd, China
	18200050	CuI		Indofine Chemical Company, Hillsborough, NJ
	18487947	CuI		Calbiochem, San Diego, CA, USA
	18561895	CuI		EMD Biosciences, Darmstadt, Germany
	19843642	CuI		Calbiochem, Gibbstown, NJ
	21702955	CuI		Calbiochem, San Diego, CA, USA
	23478800	CuI		Calbiochem, Gibbstown, NJ
	24599950	CuI		Sigma
	25237832	CuI		Sigma-Aldrich
	25787299	CuI		Tocris, Ellisville, MO
	26707799	CuI		Sigma-Aldrich
	26890145	CuI		Sigma-Aldrich
	27836799	CuI		Sigma-Aldrich
	29119966	CuI		Sigma-Aldrich
	21304528	CuIIa		Isolated and purified from roots of Hemsleya amabilis Diels
	31265865	CuIIa		Shanghai Yuanye Bio-technology Co., Ltd, Shanghai, China
	33161110	CuIIb		Shanghai Yuanye Bio-technology Co., Ltd, Shanghai, China
	15735720	CuQ		Drug Synthesis and Chemistry Branch, Developmental Therapeutics Program at NCI
	17049494		Cu-glycosides	Extracted and separated from leaves of C colocynthis (L.) Shrad
	22814677	23,24-dihydroCuF (DHCF)		Shanghai Shunbo Biotech Co., Ltd, Shanghai, China
	35324709		IsoCuD	Methanolic extract of B. Cretica
	35566048		23,24-Dihydrocucurbitacin E (DHCE)	Isolated from dichloromethane extracts of the roots of Siraitia grosvenorii
