# Supplementary material for: Modulation of Cytoskeleton, Protein Trafficking, and Signaling Pathways by Metabolites from Cucurbitaceae, Ericaceae, and Rosaceae Plant Families
Source: Pharmaceuticals (Basel). 2022 Nov 10;15(11):1380. doi: 10.3390/ph15111380 (PMC9698530; doi:10.3390/ph15111380)
Supplement: Supplementary file 1 [file pharmaceuticals-15-01380-s001.zip › Supplementary_File_S2.xlsx]

## Sheet: Sheet1
Plant Family	PMID: Reference	Purified Agent	Extract	Location Obtained/Plant details if provided
Ericaceae	22076143		Cranberry Extract	Cranberry Proanthocyanins
	20132040		Bilberry Extract	Standardized preparation of bilberry extract (Nature's Way, Springville, UT, USA)
	34846222	Ferrerol		Isolated from Rhododendron dauricum L.
	23504987	Pterostilbene		Professor Chi-Tang Ho (Rutgers University, NJ)
	27371785		Blueberry Powder	Superfruit, Sweden
	25153881	Malvidin-3-glucoside		Sigma Chemical Company, Ltd, Najing, China
	25153881	Malvidin-3-galactoside		Sigma Chemical Company, Ltd, Najing, China
	29725038		(Poly)phenol-digested metabolites	Arbutus unedo leaves (LPDMs)
	34323135		Rhododendron Luteum extract (RLE)	Dried leaf extracts from R Luteum
	33517266		Chokeberry extract from Aronia melanocarpa	Artemis International Inc., Indiana, USA
	33517266		Elderberry extract from Sambucus nigra	Artemis International Inc., Indiana, USA
	33517266		Bilberry Extract from Vaccinum myrtilus	Artemis International Inc., Indiana, USA
	27485636	Delphinidin chloride		Extrasynthese, France
	27485636	Delphinidin-3-O-glucoside (myrtillin) chloride		Extrasynthese, France
	27485636		Bilberry Extract "600761"	Symrise, Hamburg, Germany
	23581244		Bilberry Extract (BE) from V. myrtillus L.	Symrise GmbH, Germany
	19323506		Mixtures of 15 anthocyanins	Indena SpA (Milan, Italy)
	25776829	Cranberry A type proanthocyanidins (PACs) --> 11 were isolated		Purified from cranberries using HPLC and MS-based approaches
	25776829	Cranberry Flavonols were isolated (8) --> myricetin-3-galactoside, quercetin-3-galactoside, quercetin-3-glucoside, quercetin-3-xylopyranoside, quercetin-3-arabinopyranoside, quercetin-3-arabinofuranoside, quercetin-3-rhamnopyroside, quercetin aglylcone		Purified from cranberries using HPLC and MS-based approaches
	35100463		Fractionated Blueberry leaf extract	Vaccinium virgatum Aiton leaves - powder obtained from Unkai Shuzo Co., Ltd
	29532855		Rhododendron album Blume extract (RAME)	Rhododendron album Blume
	28974439	Malvidin		Sigma Chemical Company
	28974439		Blueberry Powder	Superfruit, Sweden
	19199288		Anthocyanin (ATH-BBe)	Bog blueberry Vaccinium uliginosum L ("Deol-Jugk") from North Korea
	35288783		Anthocyanin from Blueberry (BE)	Beilu (NLZ13A) (Vaccinium sp. [hybdridization from Berkeley X (Lowbush X Pioneer)] was collected from Zhuanghe, Liaoning Province, China
	31684931		Extracts of stems (VOS)	Vaccinium oldhamii Miquel
	31684931		Extracts of leaves (VOL)	Vaccinium oldhamii Miquel
	31684931		Extracts of fruits (VOF)	Vaccinium oldhamii Miquel
	25637446	Methyl salicylate 2-O-b-D-lactoside (MSL, from Gaultheria yunnanensis (Franch.) Rehder)		Institute of Materia Medica at Chinese Academy of Medical Sciences
	23952046		High molecular weight cranberry NDM (non-dialyzable material) from Vaccinium macrocarpon concentrated juice (Ocean Spray Cranberries Inc.)	Provided by Dr. I. Ofek (Tel Aviv University)
	21866950		7PA - 7 phenolic acids in Blueberry Bush: mixture of purified Hippuric acid, 3-hydroxyphenylacetic acid, 3-hydroxybenzoic acid, ferulic acid, 3-(4-hydroxyphenyl)propionic acid, 3-hydroxycinnamic acid, and 3-(3-Hydroxyphenyl)propionic acid	Sigma and Alfa Aesar
	20597478		Tifblue BB whole extract	Vaccinium virgatum
	20597478		Fractions derived from Blueberry juice	Vaccinium angustifolium Aiton from VanDyk's Health Juice Products Ltd, Caledonia, NS, Canada
	15826073		Lingonberry fruit extract	Vaccinium vitis-idaea L
	28560392	Pterostilbene		J&K Chemicals, Shanghai, China
	26762586		Blueberry juice extract	Mature lowbush blueberries (Vaccinium angustifolium Ait.) from Cherryfield Foods Inc, Cherryfield, ME
	26378019		Cranberry Extract (CPAC)	Cranberry fruit (Vaccinium macrocarpon Ait.) from Marucci Center for Blueberry and Cranberry Research, Chatsworth, NJ
	23764465	Rhododendrin		Powdered leaves extract from Rhododendron brachycarpum
	21994123		Oligomeric PACs	Vaccinium macrocarpon
	34674317	Rhodomeroterpene (RMT)		Rhododendron genus
	32106617		Blueberry anthocyanin extract (BAE)	Rabbiteye blueberry fruits (Vaccinium ashei)
	32106617	Malvidin (Mv)		Sigma Aldrich, Shanghai, China
	32106617	Malvidin-3-glucose (Mv-3-gl)		Sigma Aldrich, Shanghai, China
	32106617	Malvidin-3-galactose (Mv-3-gal)		Sigma Aldrich, Shanghai, China
	31743023	6 anthocyanins were isolated and purified: cyanidin-3-arabinoside (Cya-3-Ara), delphinidin-3-glucoside (Del-3-Glu), cyanidin-3-galacto side (Cya-3-Gal), cyanidin-3-glucoside (Cya-3-Glu), malvidin-3-galactoside (Mal-3-Glu), and petunidin-3-glucoside (Pet-3-Glu)		Fresh blueberry fruits
	26008990	Pterostilbene		Sigma-Aldrich
	32846041		Bilberry Extract	Immune, Sweden
	32692177		Blueberry anthocyanin-rich extract (BAE)	Blueberries (Northland) obtained from Dandong, Liaoning, China
	32143616		Cranberry extract (CB)	Ocean Spray Cranberries, Inc. (Lakeville, MA, USA)
	31134999		Bilberry anthocyanin (BA)	Li et al previous publication contains detailed method
	30784064		Blueberry Extract (BE)	Northblue cultivar of blueberries from an organic farm in Zhuanghe City, Liaoning Province, China
	30353672		Whole Cranberry Powder (WCP)	Cranberry fruit (Early Black variety) harvested at State Bog, Wareham, MA
	29682153		Blueberry anthocyanins (BAC)	Vaccinium ashei (Brightwell rabbiteye blueberry) from orchards of Lishui, Nanjing
	29393642	Malvidin (Mv)		Sigma Aldrich
	29393642	Malvidin-3-glucose (Mv-3-gl)		Sigma Aldrich
	29393642	Malvidin-3-galactose (Mv-3-gal)		Sigma Aldrich
	29393642		Anthocyanin-rich Blueberry extract	Brightwell rabbiteye blueberries (Vaccinium ashei)
	26567590	Cinnamtannin D1 (CNT D1)		Purified from Leaves of Rhododendron formosanum
	26472352	Pterostilbene		Sigma-Aldrich
	25757575		Bilberry Extract (Antho 50)	Ferlux S.A. (Cournon d'Auvergne, France)
	25097077	Hyperoside		Major flavonoid in leaves of R. brachycarpum
	21922132		Cranberry proanthocyanidin (PAC)	North American cranberry (Vaccinium macrocarpon)to isolate oligomeric proanthocyanidin fractions (PAC-1)
	20626034		Cranberry extract enriched in PAC (proanthocyanidins)	American cranberry (Vaccinium macrocaropon) - prepared at University of Massachusetts- Dartmouth (early Black cranberry fruit)
	20388778		Blueberry extract	Whole fresh lowbush blueberries (Vaccinium angustifolium)
	31696813		Blueberry extract	Wild fresh blueberries (Vaccinium myrtillus)
	32614624		Anthocyanin extract	Wild Blueberry (V. angustifolium)
	32614624		Phenolic Acid Extract	Wild Blueberry (V. angustifolium)
