# Supplementary material for: Modulation of Cytoskeleton, Protein Trafficking, and Signaling Pathways by Metabolites from Cucurbitaceae, Ericaceae, and Rosaceae Plant Families
Source: Pharmaceuticals (Basel). 2022 Nov 10;15(11):1380. doi: 10.3390/ph15111380 (PMC9698530; doi:10.3390/ph15111380)
Supplement: Supplementary file 1 [file pharmaceuticals-15-01380-s001.zip › Supplementary_File_S3.xlsx]

## Sheet: Sheet1
Plant Family	PMID: Reference	Purified Agent	Extract	Location Obtained/Plant details if provided
Rosaceae	30867440		Black raspberry extract	Lysophilized black raspbery powder (Berri Products, Corbett, OR)
	30867440	Ellagic acid		Indofine Chemical, Hillsborough, NJ
	30867440	Urolithin A		Santa Cruz, Dallas, TX
	30867440	Protocatechuic acid		LKT Labs, St. Paul, MN
	22197393		Methylene Chloride Extract	Aerial parts of Aruncus dioicus I var. kamtschaticus
	22197393	Aruncin B		Aerial parts of Aruncus dioicus I var. kamtschaticus
	22085704		WS1442	Hawthorn (Crataegus spp.) extract obtained from Dr. Willmar Schwabe GmbH & Co., Karlsruhe, Germany
	26590362		Red raspberry extract (RPE)	Red raspberries produced in Portugal
	28586002		SC extract	Sorbus commixta Hedl. Stems and cortex (Gyeongsangbuk-do province, Korea) obtained from Omniberh Co. (Daegu, Korea)
	34062758		Extract from berries	6 species of Crataegus: C. monogyna, C. rhipidophylla, C. x subsphaericea (hybrid C. rhipidophylla and C. laevigata), C. laevigata x rhipidophylla x monogyna, C. macrocarpa (hybrid C. rhipidophylla and C. monogyna), C. laevigata
	34062758		Extract from leaves	6 species of Crataegus: C. monogyna, C. rhipidophylla, C. x subsphaericea (hybrid C. rhipidophylla and C. laevigata), C. laevigata x rhipidophylla x monogyna, C. macrocarpa (hybrid C. rhipidophylla and C. monogyna), C. laevigata
	34062758		Extract from flowers	6 species of Crataegus: C. monogyna, C. rhipidophylla, C. x subsphaericea (hybrid C. rhipidophylla and C. laevigata), C. laevigata x rhipidophylla x monogyna, C. macrocarpa (hybrid C. rhipidophylla and C. monogyna), C. laevigata
	34626932		Red raspberry extract (RBE)	Red raspberries from a local farm in Anhui Province, China
	34663517		Sanguisorba officinalis extract (SOE)	Sanguisorba officinalis roots
	34663517	Quercetin		Shanghai Standard Technology Co. Ltd, China
	34663517	Kaempferol		Shanghai Standardization Research Center, China
	34663517	Gallic Acid		Adamas-beta
	34663517	Ellagic Acid		Adamas-beta
	20503393		Pygeum africanum extract (PA)	Elfar-Drag, Madrid, Spain
	24161487		Rubus idaeus L. Extract (RIE)	Dried raspberry obtained from a store (imported from North America) in Taichung, Taiwan
	27058760		Selinium-enriched polysaccharides from Pyracantha fortuneana (Se-PFPs)	Obtained from Pyracantha fortuneana
	28371048		Duchesnea indica extract (DIE)	Duchesnea indica leaves obtained from local herb stores in Taichung, Taiwan
	29389559	Phloretin		Apples (not stated)
	34785413		Sanguisorba officinalis Linn. (DiYu) extract	Rhizome of Sanguisorba officinalis
	26260864		Saskatoon Berry powder	Fresh Smoky SB from Prairie Lane Saskatoons (Portage, Manitoba, Canada)
	26260864	cyanidin-3-glucoside (C3G)		Polyphenols, Sandnes, Norway
	26260864	cyanidin-3-galactoside (C3Ga)		Polyphenols, Sandnes, Norway
	27142738		Raspberry seed powder	Millennium @ Health (Meeker Red Seed Flour)
	29164883	Raspberry Ketone (RK)		Sigma-Aldrich
	30340105	Asiatic Acid (AAPC)		Purified from Potentilla chinesis
	31760233		Malus micromalus Makino phenolic extract (MMPE)	Malus Micromalus Makino obtained from Binzhou, Shandong, China
	34004342		Saskatoon Berry powder (SBp)	Fresh Smoky SB from Prairie Lane Saskatoons (Portage, Manitoba, Canada)
	34004342	cyanidin-3-glucoside (C3G)		Polyphenols, Sandnes, Norway
	34389368		Strawberry Tree Honey (STH)	Strawberry tree (Arubutus unedo L.) honey - Prof. Gavino Sanna (Department of Chemistry and Pharmacy at the University of Sassari, Italy)
	33572926		Rosa canina methanol extract (RCME)	powder from dried Rosa Canina flowers
	24893859		Lysophilized black raspberry ethanol extract (BRB)	Rubus occidentalis extract prepared by Nutrient and Phytochemical Analytical Shared Resource at The Ohio State University
	24893859	Cyanidin-3-rutinoside (C3R)		Indofine Chemical, Hillsborough, NJ
	24893859	Quercetin-3-rutinoside (Q3R)		Sigma, St. Louis, MO
	27599590		Sanguisorbae Radix water extract (WSR)	Sanguisorbae Radix was obtained from Yeongcheon Oriental Herbal Market, Korea
	31010164		Ethanolic extract from Rosa cymosa fruits (RCE)	Rosa Cymosa fruits
	33266427		Water extract of Rubi Fructus (RF)	Commercial Rubi Fructus from Omniherb, Daegu, Korea
	12467906		Bainiku-ekisu	Fruit juice concentrate of the Oriental Plum (Prunus mume), Wakayama, Japan
	15884858		Strawberry Extracts	Strawberry fruits (Fragaria × ananassas cv. Earliglow) used in this study were grown at Butler’s Orchard in Germantown, MD
	17360708	Cyanidin-3-tuinoside (C3R)		Purified from black raspberry cultivar Jewel extract
	18497943		GjT Extract - methylene chloride fraction	Geum japnonicum Thunberg (GjT) from Laboratory of Molecular Physiology and Biochemistry, National Institute of Agricultural Biotechnology (NIAB), Korea
	18773430	Trihydroxybenzaldehyde (THBA)		from Geum Japonicum provided by Dr. Jung Bong Kim, NIAB, Korea
	19418353		Immature Plum Extract (IPE)	P. salicina Lindl. cv. Soldam, plum farm in Gimcheon, Gyungbook
	19418353		Midmature Plum Extract (MMPE)	P. salicina Lindl. cv. Soldam, plum farm in Gimcheon, Gyungbook
	19418353		Mature Plum Extract (MPE)	P. salicina Lindl. cv. Soldam, plum farm in Gimcheon, Gyungbook
	19622193		Marie Menard Apple Powder (Skin and Pulp)	Cider apple fruits (Malus domestica Borkh.) from the Marie Menard variety at maturity in experimental orchard of the Center Technique des Productions Cidricoles (Sees, Orne, France)
	19622193		Golden Delicious Apple Powder (Skin and Pulp)	Golden Delicious apples from a local wholesale grocery at the same location
	19665545		LEJL extract	Leaves of Eriobotrya japonica from Bohwa Dang, Jeonbuk, Korea
	22075758		Water extract of the ripe fruits of Rubus coreanus Miq. (RFRC)	Ripe fruits of Rubus coreanus from Black Raspberry Experiment status, Gochang Agricultural Extension Center, Jeonbuk, Korea
	22964088		Apple Polyphenol (APP)	JF-Natural, Tianjing, China
	24720857		Prunus yedoensis bark extract (PYE)	P. yeodoensis bark was obtained from Dongwoodang Co. Ltd., Yeongchen, South Korea
	25105919		Total flavonols (TFs)	Rosa laevigata Michx fruit from Yunnan Qiancaoyuan Pharmaceutical Company, Co. Ltd, Yunnan, China
	25637445	Astragalin		Bioactive component from Rosa agrestis, Shanghai PureOne Biotechnology Co., Ltd, Shanghai, China
	25898017		F. mume extract	Fructus mume processed unripe fruit of Prunus mume, Kwangmyung-Dang, Ulsan, Korea
	26345541	Prunetin		Sigma-Aldrich: an O-methylated isoflavone found in several foods (Trifolium pratense, seed of Pisum sativum and fruit of Prunus avium)
	26882870		Chaenomeles thibetica extracts (CTE)	C. thibetica fruits, Tibetan Traditional Medicine Pharmaceutical Factory, Lhasa City, Tibet
	27632912		Apple extract (AE)	Malus pumila Mill., Geochang Gun, Gyeongsangnam Do, Korea
	29164624		Sorbus commixta twig ethanol extract (STE)	Twigs from Sorbus commixta, Yangnyeong traditional market, Seoul, Korea
	29421853		Cherry Blossom Extract (CBE)	Fresh blossoms of Prunus yeonesis, Kyung Hee University
	29966991		Rubus idaeus L. Extracts (RI)	Dried fruit of rubus idaeus L.
	30032605		Hawthron polyphenol extract (HPE)	“Yanranghong” hawthorn (Crataegus pinnatifida Bge. var. major N. E. Br.) fruits, Hebei, Chengde, Hawthorn Industrial Technology Research Institute, Xinglong, China\
	31094612		Pourthiaea villosa (Thunb.) Decne. Leaf Extract (PVDF)	Pourthiae villosa (Thunb.) Decne. Leaf extract, Jocheon-eup, Jeju-do, Korea
	33562140		Crataegus laevigata extract	Berries from Crataegus laevigata (midland hawthorn), Starwest Botanicals, Inc., Sacramento, CA, USA
	34455178		Rosa davurica Pall. Leaves (RDL) extract	Leaves of Rosa davurica Pall., Jungsun, Korea
	34500840		Potentilla glabra Ethanol Extract (Pg-EE)	Potentilla glabra var. mandshurica (Maxim.) Hand.-Mazz
	21875324		Polyphenolic Extracts and Fractions: KPF1-8 and IPF1-5	Native australian fruits Illawarra plum (Podocarpus elatus Endl., Podocarpaceae) and Kakadu plum (Terminalia ferdinandiana Exell, Combertaceae), Tanamera Native Produce Lty., Ltd., Obum Obum, Australia
	22252293		Quince peel polyphenol extract	Peels from Tunisian quince Cydonia oblonga Miller
	23148028		Crataegus pinnatifida fruit extract	Fruits from Crataegus pinnatifida, Kumkang Pharm Inc., Ansung, Korea
	24335666		Raspberry methanol extract (RIME)	Berries from Rubus idaeus, Taichung, Taiwan
	24335666		Raspberry chloroform extract (RICE)	Berries from Rubus idaeus, Taichung, Taiwan
	24335666		Raspberry ethyl acetate extract (RIAE)	Berries from Rubus idaeus, Taichung, Taiwan
	24335666		Raspberry n-butanol extract (RIBE)	Berries from Rubus idaeus, Taichung, Taiwan
	24335666		Raspberry water extract (RIWE)	Berries from Rubus idaeus, Taichung, Taiwan
	25446010		Enriched anthocyanins fraction of black raspberry ethanol extract (BRE)	Dr. Gary D Stoner, Medical College of Wisconsin
	25763529		Lyophilized strawberries	Fragaria x ananassa, California Strawberry Commission
	25996641	Phloretin		Sigma-Aldrich
	26178971		Ethanol extract of loquat leaf (LE)	Eriobotrya japonica, Marine Bio-industry Development Center, Busan, Korea
	29601810	2’,3-dihydroxy-5-methoxybiphenyl (RIR-2)		Extracted and purified from the roots of Rhaphiolepis indica (L.) Lindl. ex Ker var. tashiroi Hayata ex Matsum. & Hayata (Rosaceae).
	30195065		Red Raspberry extract (RRE)	Fresh red raspberries from Rubus idaeus L., Shangzhi, Heilongjiang Province
	31495058		Ethanol extract of S. officinalis	Ethanol extract from Sanguisorba officinalis, Importer of Chinese medicine
	31495058	Ellagic acid		Purified from Ethanol extract from Sanguisorba officinalis, Importer of Chinese medicine
	31829236		Aronia melanocarpa extract (AME)	Fruits from Aronia melanocarpa
	32253400		Total flavonoids (TF)	Loquat leaves (Eriobotrya japonica), Suzhou city of Jiangsu province, China
	32615370		Whole extract phenolics (WE)	Concentrated juice from Dark sweet cherry sweet (Prunus avium)
	32615370		Anthocyanin enriched fraction (ACN)	Concentrated juice from Dark sweet cherry sweet (Prunus avium)
	32615370		Proanthocyanidin enriched fraction (PCA)	Concentrated juice from Dark sweet cherry sweet (Prunus avium)
	32924599		Whole extract phenolics (WE)	Concentrated juice from Dark sweet cherry sweet, FruitSmart Inc., Grandview, WA, USA
	32924599		Anthocyanin enriched fraction (ACN)	Concentrated juice from Dark sweet cherry sweet, FruitSmart Inc., Grandview, WA, USA
	32924599		Proanthocyanidin enriched fraction (PCA)	Concentrated juice from Dark sweet cherry sweet, FruitSmart Inc., Grandview, WA, USA
	33158043		Rose Petal Extract (RPE)	Rosa gallica petals, Turkey, GN Bio, Gyeonggi, Korea
	34374443		Fresh Agriomonia Pilosa methanolic extract (APLME)	Agriomonia Pilosa
	34392532		Apple Flesh/Pulp (AFP) or peel (APP) phenolic extract	Meihong apples, F2 hybrid populations of Malus siev ersii f. niedzwetzkyana (Ledeb.) M. Roem, Guanxian fruit tree breeding base, Shandong Agricultural University
	35066145		Potentilla anserine L. polysaccharide (PAP)	From Ethanol insoluble fraction of Potentilla anserina L. water extract
	35639036		Polyphenol-rich extract	Leaves of the Japanese quince, Chaenomeles japonica, Poland
	21195756		Sorbus commixta water extract (Sc-WE)	Dried inner stem bark of Sorbus commixta, Inje, Kangwon, Korea
	22142480		Chokeberry extract (CBE)	Frozen Aronia berries from Northern Europe
	22924395		Apple Triternoids from peels (ATT)	Peels of Fresh apples of red Fuji variety, Wuhan, China
	25130744		50% ethanol extracts of unripe RCM (UE)	Rubus coreanus Miquel, Gochang Province, South Korea
	25130744		aqueous extracts of unripe RCM (UH)	Rubus coreanus Miquel, Gochang Province, South Korea
	25130744		50% ethanol extracts of ripe RCM (RE)	Rubus coreanus Miquel, Gochang Province, South Korea
	25130744		aqueous extracts of ripe RCM (RH)	Rubus coreanus Miquel, Gochang Province, South Korea
	25546248		Apple procyanidin fraction with a degree of polymerization of 4 (DP4)	Apples (not stated)
	28683738		Roots, leaves, and fruit extracts	Root, Leaves, or Fruits of Sarcopoterium spinosum (L.) Sp., wild area around Ariel University
	30467676		Pruni Cortex	Bark from the Prunus jamasakura
	30467676	Sakuranetin		Extrasynthase, Lyon, France
	30467676	Naringenin		LKT Labs, St. Paul, MN
	30467676	Naringin		Sigma-Aldrich, St Louis, MO
	32298737	Euscaphic acid		Isolated to >98% purity from root of Potentilla anserine L.
	32298737	Tormentin acid		Isolated to >98% purity from root of Potentilla anserine L.
	32544818	PDB-1		Purified >95% from ethanol extracts of P. discolor Bunge
	33641052		Rough Plum Polyphenols (RPP)	Pulp from the Wushancuili, from a local agricultural market in Wushan county, Chongqing city, China
	33641052		Purified Plum Polyphenols (PPP)	Pulp from the Wushancuili, from a local agricultural market in Wushan county, Chongqing city, China
	33773689		Hawthron Fruit Extracts (HPE)	Shanlihong Hawthron fruits with no seeds (C pinnatifia Bge var major N.E. Br.), China
	34483915		ALM Extract	Aerial parts of Alchemilla monitcola, Rhodope mountain, Bulgaria
	34483915	Astragalin (AST		PhytoLab GmbH and Co, Germany
	34483915	Quercitrin (QUE)		PhytoLab GmbH and Co, Germany
	35533849		Polysaccharide Extract (RRP)	Petals of Rosa rugosa
	35809756		Whole plant extract (FPE)	Whole tissue of Filipendula palmata (Pall.) Maxim, Northern Gyeonggi, Korea
