# Supplementary material for: Modulation of Cytoskeleton, Protein Trafficking, and Signaling Pathways by Metabolites from Cucurbitaceae, Ericaceae, and Rosaceae Plant Families
Source: Pharmaceuticals (Basel). 2022 Nov 10;15(11):1380. doi: 10.3390/ph15111380 (PMC9698530; doi:10.3390/ph15111380)
Supplement: Supplementary file 1 [file pharmaceuticals-15-01380-s001.zip › Supplementary_File_S4.xlsx]

## Sheet: Sheet1
Plant Family	PMID	Topic/Disease
Cucurbitaceae	28573224	Cancer, Lung
	29552771	Cancer, Ovarian
	18405967	Cancer, Myeloid Leukemia
	18561312	Cancer, Glioblastoma Multiforme
	18627377	Cancer, Breast
	19605406	Cancer, Pancreatic
	20182390	Cancer, Pancreatic
	20590594	Cancer, Pancreatic
	21866566	Cancer, Pancreatic
	22151918	Cancer, Hepatic
	22699368	Cancer, Leukemia
	23062075	Cancer, Breast
	23340170	Cancer, Lung
	24691407	Cancer, Melanoma
	24729020	Cancer, Breast
	25487942	Cancer, Neuroblastoma
	26183715	Cancer, Colorectal
	27350399	Cancer, Breast
	28042385	Cancer, Hepatic
	28390176	Heart Failure/Cardiovascular
	28673003	Cancer, Osteosarcoma
	29393542	Cancer, Glioblastoma Multiforme
	30106443	Cancer, Breast
	30470919	Cancer, Cholangiosarcoma
	30548720	Cancer, Breast
	30759826	Cancer, Lung
	31801971	Cancer, Colorectal
	33664249	Cancer, Nasopharyngeal
	33799222	Cancer, Lymphoma
	34954267	Cancer, Colorectal
	34967707	Cancer, Melanoma
	31780930	Cancer, Multi-types
	29658590	Cancer, Gastric
	32914311	Cancer, T-cell Leukemia
	33029168	Cancer, Pancreatic
	8937470	Cancer, Prostate
	9202647	Endothelial Proliferation
	20110807	Cancer, Leukemia
	20347305	Cancer, Leukemia
	20732905	Tumor Angiogenesis
	22724897	Actin Depolymerization
	22842972	Cancer, Breast
	25072848	Cancer, Breast
	25970614	Cancer, Multi-types
	26453509	Rheumatoid Arthritis
	27106530	Cancer, Lung
	30131725	Cancer, Intestine
	32012950	Cancer, Hepatic
	32568828	Cancer, Esophageal
	32616188	Cancer, Lung
	32982778	Cancer, Intestine
	12649187	Cancer, Multi-types
	18200050	Cancer, Sezary Syndrome (leukemia/lymphoma)
	18487947	Cancer, Glioblastoma Multiforme
	18561895	Cancer, Colon
	18930029	Cancer, Prostate
	19843642	Cancer, Nasopharyngeal
	21702955	Cancer, Leukemia
	23478800	Cancer, Breast
	24599950	Cancer, Glioblastoma Multiforme
	25237832	Cancer, Glioblastoma Multiforme
	25787299	Cancer, Breast
	26707799	Actin Aggregation
	26890145	Cancer, Gastric
	27836799	Cancer, Cardiac toxicity
	29119966	Cancer, Multi-types
	29207097	Cancer, Lung
	29575175	Cancer, Lung
	33621387	Cancer, Breast
	21304528	Cancer, Multi-types
	31265865	Cancer, Lung
	33161110	Cancer, Lung
	15735720	Cancer, Multi-types
	26372186	Cancer, Lung
	25674792	Cancer, Lung
	17049494	Cancer, Breast
	22814677	Cancer, Prostate
	35566048	Cancer, Gastric
Plant Family	PMID	Topic/Disease
Ericaceae	22076143	Enteric Infections
	20132040	Cancer, Breast
	34846222	Cancer, Multi-types
	23504987	Cancer, Breast
	27371785	Cancer, Oral Squamous Cell
	25153881	Inflammatory response in Endothelial Cells
	29725038	Neurodegenerative Diseases
	34323135	Cancer, Cervical
	33517266	Cancer, Glioblastoma Multiforme
	27485636	Cancer, Epidermoid
	23581244	Cancer, Colon
	19323506	Chemoprevention
	25776829	Cancer, Ovarian
	35100463	Cancer, Leukemia
	29532855	Atopic Dermatitis
	28974439	Cancer, Oral Squamous Cell
	19199288	Skin Photoaging, UVB irradiation
	35288783	Helicobacter Pylori-induced Peptic Epithelium Injury
	31684931	Diseases, Inflammation
	25637446	Rheumatoid Arthritis
	23952046	Periodontitis
	21866950	Cardiovascular Diseases
	20597478	Cognitive Deficits
	18789000	Alzheimer's Disease
	15826073	Carcinogenesis
	28560392	Cancer, Melanoma
	26762586	Cancer, Breast
	26378019	Cancer, Esophageal
	23764465	Inflammatory Skin Diseases
	21994123	Cancer, Neuroblastoma
	34674317	Acute Kidney Injury
	32106617	Cardiovascular Diseases
	31743023	Type 2 Diabetes, Insulin-Resistance
	26008990	Endothelial Dysfunction
	32846041	Vascular Dysfunction/Cardiovascular Diseases
	32692177	Hyperlipidemia/Insulin Resistance
	32143616	Cancer, Myeloid Leukemia
	31134999	Perimenopausal symptoms
	30784064	Cancer, Colorectal
	30586992	Cancer, Hepatic
	30353672	Inflammatory Bowel Disease
	29682153	Diabetic Retinopathy
	29393642	Macular Degeneration
	26567590	Cancer, Lung
	26472352	Cancer, Colorectal
	25757575	Cancer, Lymphocytic Leukemia
	25097077	Vascular Inflammatory Diseases
	22219179	Cancer, Breast
	21922132	Cancer, Ovarian
	20626034	Cancer, Prostate
	20388778	Cancer, Breast
	18457678	Memory and Learning
	31696813	Cancer, Stomach
	32614624	Angiogenesis
Plant Family	PMID	Topic/Disease
Rosaceae	30867440	Cancer, Prostate
	22197393	Cancer, Leukemia
	22085704	Endothelial Hyperpermeability
	26590362	Neovascularization
	28586002	Cancer, Hepatic
	34062758	Cancer, Glioblastoma Multiforme
	34626932	Hepatic Fibrosis
	34663517	Melanogenesis
	20503393	Cancer, Prostate
	24161487	Cancer, Lung
	27058760	Cancer, Ovarian
	28371048	Cancer, Lung
	29389559	Cancer, Breast
	34785413	Cancer, Colorectal
	26260864	Diabetes
	27142738	Metabolic Syndrome
	29164883	Obesity
	30340105	Non-alcoholic Fatty Liver Disease (NAFLD)
	31760233	Lead Toxicity
	34004342	Hepatic Steatosis
	34389368	Cancer, Colon
	33572926	Inflammatory Bowel Disease
	17094456	Cancer, Colon
	30134638	Obesity
	24893859	Cancer, T Cell Lymphoma
	27599590	Allergic Skin Diseases
	31010164	Cancer, Acute Lymphocytic Leukemia
	33266427	Inflammation
	12467906	Vascular Hemodynamics
	15884858	Chemoprevention
	17360708	Cancer, Leukemia
	18497943	Cancer, Melanoma
	18773430	Vascular Diseases
	19418353	Cancer, Hepatic
	19622193	Cancer, Colon
	19665545	Allergic Inflammatory Diseases
	22075758	Allergic Inflammatory Diseases
	22964088	Acute Lung Injury, COPD
	24720857	Inflammation
	25105919	Inflammation
	25637445	Inflammation, Osteoarthritis
	25898017	Cerebral Blood Flow Dysfunction
	26345541	Bone growth and maintenance
	26882870	Liver Injury
	27632912	Tissue Regeneration
	29164624	Skin Photoaging, UVB irradiation
	29421853	Skin Photoaging, UVB irradiation
	29966991	Skin Photoaging, UVB irradiation
	30032605	Skin Photoaging, UVB irradiation
	31094612	Skin aging, Hydrogen Peroxide
	33562140	Inflammation
	34455178	Atopic Dermatitis
	34500840	Skin Photoaging, UVB irradiation
	18816058	Hypertension
	21875324	Chemoprevention
	22252293	Inflammation
	23148028	Hair Follicle Cycling
	24335666	Cancer, Lung
	25446010	Inflammation
	25763529	Cancer, Colorectal
	25996641	Cancer, Lung
	26178971	Muscles, Aging
	29601810	Host Defense, Neutrophils
	30195065	Cancer, Hepatic
	31495058	Cancer, Melanoma
	31829236	Maintenance of Skeletal Muscle Mass
	32253400	Acute Lung Injury, COPD
	32615370	Cancer, Breast
	32924599	Cancer, Breast
	33158043	Cancer, Lung
	34374443	Cancer, Fibrosarcoma
	34392532	Cancer, Breast
	35066145	Cadmium-induced Neurotoxicity
	35639036	Cancer, Colon
	21195756	Inflammation
	22142480	Insulin Resistance
	22924395	Cancer, Breast
	25130744	Cancer, Prostate
	28683738	Diabetes
	30467676	Inflammation
	32298737	Inflammation
	32544818	Cancer, Lung
	33641052	Cancer, Lung
	33773689	Type 2 Diabetes
	34483915	Obesity
	35533849	Cancer, Cervical
	35809756	Skin Inflammation
